# Supplementary material
Source: HighWire-hosted journal article supplement (https://ejhp.bmj.com/content/ejhpharm-2021-002803)

Supplemental figure 1 Preferred reporting items for systematic reviews and meta-analyses flow diagram of study selection process.

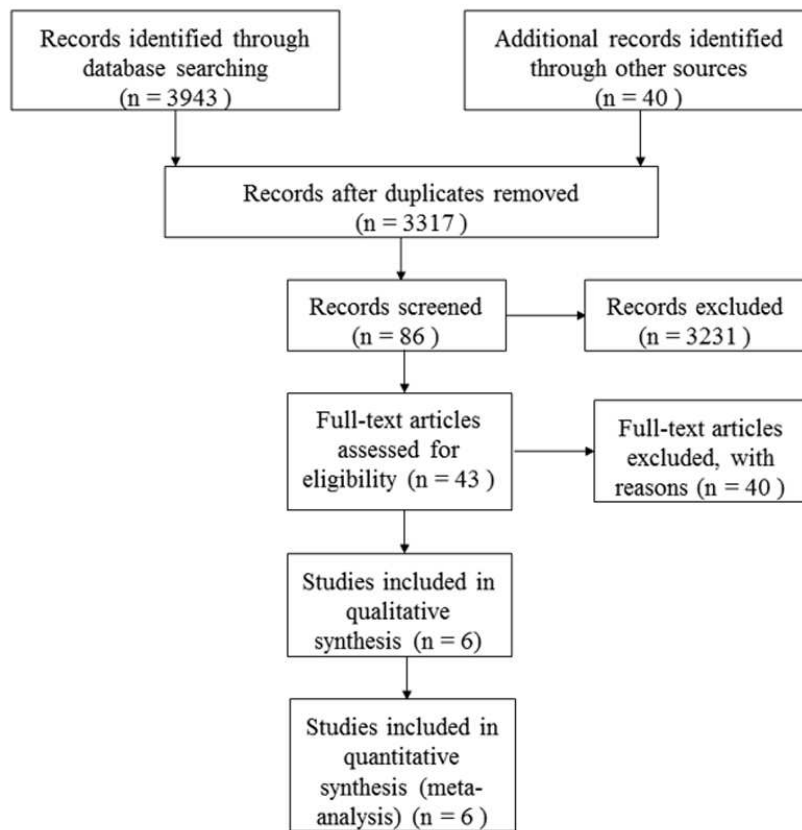

Supplement: inline-supplementary-material-1 [file inline-supplementary-material-1.pdf]
