# Supplementary material
Source: HighWire-hosted journal article supplement (https://ejhp.bmj.com/content/ejhpharm-2021-002803)

Supplemental figure 3 Funnel plots of publication bias of ratio risk for overall response rate in the meta-analysis.

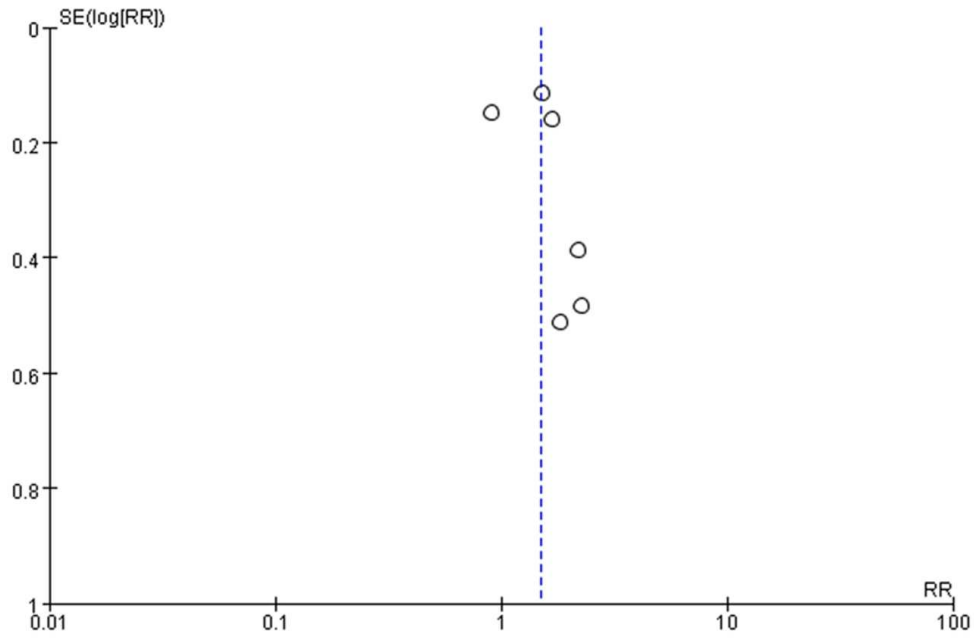

Supplement: inline-supplementary-material-4 [file inline-supplementary-material-4.pdf]
