# Supplementary material
Source: HighWire-hosted journal article supplement (https://ejhp.bmj.com/content/ejhpharm-2021-002803)

Supplemental figure 5 Egger's test of ratio risk on overall response rate.

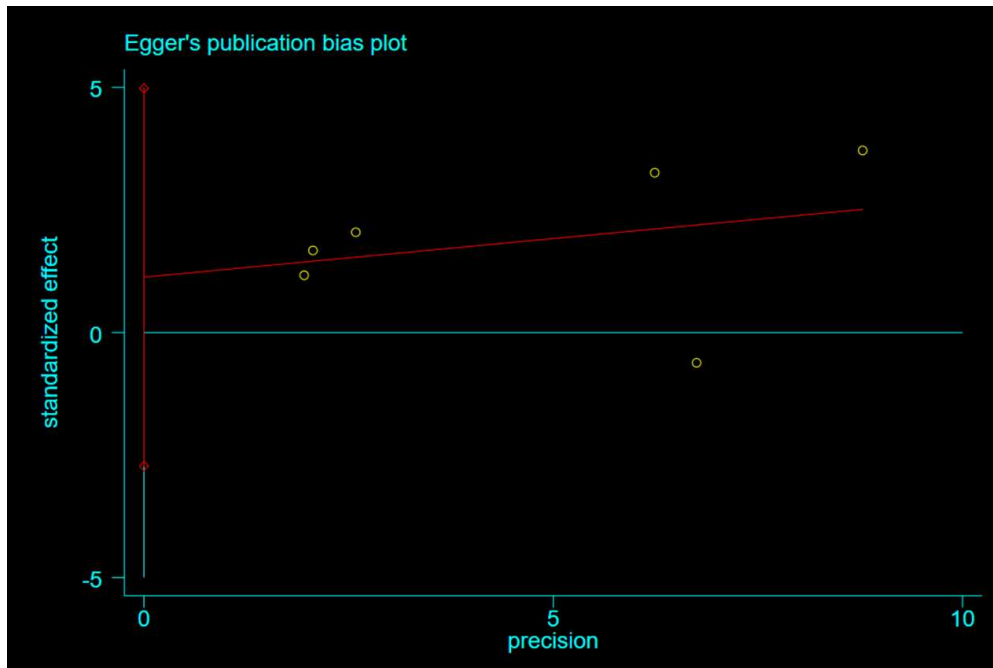

Supplement: inline-supplementary-material-6 [file inline-supplementary-material-6.pdf]
